# Supplementary material for: Neural Organization of A3 Mushroom Body Extrinsic Neurons in the Honeybee Brain
Source: PubMed Central journal article supplement (PMC6089341; doi:10.3389/fnana.2018.00057), 2018-08-03
Supplement: Table_1.pdf [file Table_1.pdf]

| insectbraindb.org | Name in paper      | Figure number                         | Single cell | Soma cluster | Mushroom body calyx innervation  |                                  |                                              | Medial lobe innervation          |                                |                                        | Vertical lobe innervation         |                             |                               |                                                                  |
|-------------------|--------------------|---------------------------------------|-------------|--------------|----------------------------------|----------------------------------|----------------------------------------------|----------------------------------|--------------------------------|----------------------------------------|-----------------------------------|-----------------------------|-------------------------------|------------------------------------------------------------------|
|                   |                    |                                       |             |              | lip                              | co                               | br                                           | lip division                     | co division                    | br division                            | innervation first 30µm n-anterior | lip division                | co division                   | br division                                                      |
| A3-d2             | A3 <sub>c</sub> 1  | 5E                                    | yes         | d            | no                               | no                               | no                                           | n.d.                             | n.d.                           | n.d.                                   | yes                               | no                          | no                            | narrow, dense innervation                                        |
| A3-d3             | A3 <sub>c</sub> 2  | 2A, 4F, 5C mirrored                   | yes         | d            | no                               | no                               | no                                           | no                               | no                             | sparse innervation with blebs          | yes                               | no                          | sparse innervation            | medium innervation (with blebs) and dense innervation (no blebs) |
| A3-d4             | A3 <sub>c</sub> 3  | 4G, 5B mirrored                       | yes         | d            | no                               | no                               | no                                           | no                               | no                             | sparse innervation possibly with blebs | yes                               | dense innervation           | no                            | broad, sparse innervation, with blebs                            |
| A3-d5             | A3 <sub>c</sub> 4  | 4C, 4H, 5D, video S1                  | yes         | d            | no                               | no                               | no                                           | dense innervation with few blebs | no                             | no                                     | yes                               | dense innervation           | no                            | no                                                               |
| A3-v1             | A3 <sub>rb</sub> 2 | 2B, 3D mirrored, 4B, 4I, 5F, video S2 | yes         | v            | centrally, dense innervation     | no                               | no                                           | asymmetric, medium innervation   | no                             | no                                     | no                                | narrow, medium innervation  | no                            | no                                                               |
| A3-v2             | A3 <sub>rb</sub> 3 | 4B, 4K                                | yes         | v            | inner margin, sparse innervation | no                               | no                                           | sparse innervation with blebs    | no                             | no                                     | no                                | narrow, sparse innervation  | no                            | no                                                               |
| A3-v3             | A3 <sub>rb</sub> 4 | 4E, 4J mirrored                       | yes         | v            | no                               | outer collar, medium innervation | no                                           | no                               | asymmetric, medium innervation | no                                     | yes                               | n.d.                        | n.d.                          | n.d.                                                             |
| A3-v4             | A3 <sub>rb</sub> 5 | 3G mirrored                           | yes         | v            | no                               | no                               | dorsal, medium innervation, very large blebs | no                               | no                             | no                                     | no                                | no                          | no                            | narrow, dense innervation                                        |
| A3-v5             | A3 <sub>rb</sub> 6 | 3C mirrored, 4D                       | yes         | v            | fully, sparse innervation        | no                               | no                                           | yes, npe                         | n.d.                           | n.d.                                   | n.d.                              | sparse innervation          | no                            | no                                                               |
| A3-1              | A3-1               | 3F, 5A mirrored, 5I, S1, video S3     | no          | 1v, 1d soma  | no                               | centrally, dense innervation     | no                                           | n.d.                             | n.d.                           | n.d.                                   | yes                               | no                          | yes                           | with blebs                                                       |
| A3-2              | A3-2               | --                                    | no          | several soma | n.d.                             | n.d.                             | n.d.                                         | sparse innervation               | n.d.                           | sparse innervation                     | broad, dense innervation          | n.d.                        | n.d.                          | n.d.                                                             |
| A3-3              | A3-3               | 3E mirrored, 5H                       | no          | 3v, 1 d      | inner margin, medium             | outer collar, medium innervation | no                                           | n.d.                             | n.d.                           | n.d.                                   | yes                               | n.d.                        | dense innervation, with blebs | n.d.                                                             |
| A3-4              | A3-4               | --                                    | no          | 4v, 3d soma  | no                               | outer collar, sparse innervation | fully, sparse innervation                    | n.d.                             | sparse innervation             | sparse innervation                     | yes                               | n.d.                        | n.d.                          | yes, npe                                                         |
| A3-5              | A3-5               | 3B, 5G mirrored                       | no          | 5 soma       | outer margin, sparse innervation | no                               | no                                           | medium innervation               | asymmetric, sparse innervation | medium innervation                     | yes                               | medium to dense innervation | medium innervation with       | sparse innervation to dense with blebs                           |
| A3-6              | A3-6               | --                                    | no          | 2 soma       | outer margin, sparse innervation | no                               | no                                           | dense innervation                | no                             | no                                     | n.d.                              | yes, npe                    | no                            | no                                                               |

n.d. = not determinable; npe = not possible to evaluate innervation density
